# Supplementary material
Source: ML conference proceedings conference paper supplement (https://openreview.net/forum?id=OHFNJoNtjW)
Supplement: supplementary_material [file Appendix_MLES.pdf › supplementary_material/Appendix_MLES.pdf]

## A DISCUSSION AND LIMITATION

### A.1 OUTLOOK OF MLES FOR CONTROL POLICY DISCOVERY

This paper provides a preliminary yet compelling demonstration of the Multimodal Large Language Model-assisted Evolutionary Search (MLES) framework for automatically discovering programmatic control policies. As evidenced by the results in the Car Racing task (Appendix F), MLES successfully constructed a data processing pipeline for image input, guiding control decisions for steering, throttle, and braking with flawless performance across various tracks. This foundational success points toward several exciting future directions and highlights the framework’s significant potential.

**Modularity enables hybrid architectures for complex scenarios.** As observed in Appendix F, the programmatic policies discovered by MLES are inherently modular, typically separating into feature processing and decision-making components. This separation provides a powerful pathway for tackling more complex environments. Our framework’s ability to autonomously leverage sophisticated libraries like OpenCV highlights its potential for integrating even more advanced perception modules.

For instance, a pre-trained convolutional neural network (CNN) could be employed for high-dimensional visual processing. The output from this module—whether processed features or intermediate computations—can then be fed into a transparent control logic for decision-making. This creates a compelling opportunity for hybrid AI systems that merge the feature-learning power of deep learning with the transparency and verifiability of code-based control logic. In stark contrast to end-to-end DRL, where perception and control are inextricably coupled within an opaque network, our approach ensures that even when perception is a black box, the critical decision logic remains fully transparent and verifiable. Such a capability is not just an advantage but a necessity for real-world applications like autonomous driving and embodied intelligence, where handling complex sensory inputs must be paired with the highest levels of safety and verifiability.

**Human-in-the-loop collaboration.** The modular, code-based nature of MLES policies also uniquely facilitates human-expert collaboration. In DRL, the tight coupling of the entire network makes it challenging to modify specific control preferences. MLES, however, allows experts to inspect and intervene at any stage of the policy discovery process. If a deficiency is identified, an expert can manually edit the relevant code block and re-insert the improved policy into the evolutionary pool for further automated refinement. This enables continuous expert-assisted refinement. Furthermore, this collaboration can be streamlined via natural language: an expert could simply identify a failure mode (e.g., “the agent brakes too late on sharp turns”) and provide this feedback in a prompt, allowing the MLES framework to automatically generate a targeted modification. This creates a seamless and efficient workflow for expert-guided policy optimization.

**Facilitating knowledge transfer and reuse.** One of the most significant advantages of MLES is that the discovered policies are encoded as executable code, which greatly simplifies knowledge transfer and reuse. In DRL, transferring knowledge often involves complex mechanisms like transfer learning or fine-tuning, which can be resource-intensive and difficult to implement. MLES bypasses these challenges by directly encoding prior knowledge into code. This approach not only makes knowledge transfer easier but also accelerates the policy deployment process. Additionally, LLMs can assist in this translation process, further reducing the time and effort required. As a result, MLES is particularly beneficial for tackling problems that involve well-established expert knowledge.

Moreover, this ease of transfer extends to addressing generalization challenges. In many tasks, different instances of the same problem may require subtle adjustments to the policy for optimal performance. Despite these variations, the core logic of the policy generally remains consistent. As such, instead of starting from scratch for each new instance, MLES can adapt and fine-tune existing policies with minimal adjustments, ensuring continued high performance. A promising future direction for MLES is the collaborative evolution of policies for instances across multiple distributions, facilitating knowledge sharing of high-performing policies across different scenarios during the evolutionary process. This approach will be demonstrated in future work.

With the integration of visual feedback-driven behavior analysis, MLES mimics how human experts design policies—actively evaluating and adjusting policies in response to feedback. The key advantage is that MLES operates fully automatically and can scale indefinitely, given sufficient computational

resources. This scalability significantly accelerates the discovery of viable policies. In summary, MLES holds substantial potential to be a promising paradigm for transparent control policy discovery. We believe that MLES offers a new path forward for the field and invite the broader research community to explore and contribute to this exciting area.

## A.2 COMPUTATIONAL CONSIDERATIONS AND COST-BENEFIT ANALYSIS

MLES introduces a computational paradigm distinct from traditional DRL. Instead of relying on intensive and prolonged local GPU computation for model training, the primary resource consumption in MLES stems from the inference process of Multimodal Large Language Models (MLLMs).

This inference can be realized through two primary modalities: API-based services or local deployment. In this work, we utilize the API-based approach. While this incurs a direct financial cost, the expenditure is surprisingly modest, especially when weighed against the unique value generated. For instance, our experiments show that solving the Car Racing benchmark, which required approximately 2000 requests to a cost-effective MLLM (such as GPT-4o mini), incurred a total cost of around 0.42 USD. Crucially, this nominal cost achieves a goal that is fundamentally unattainable for DRL, regardless of its computational budget: the generation of transparent, human-readable programmatic policies. Therefore, from a cost-benefit perspective, MLES offers an exceptionally favorable trade-off, exchanging a minor financial outlay for a critical capability that traditional methods cannot provide.

Furthermore, this API-centric paradigm offers a significant, often-overlooked advantage: a minimal requirement for local hardware resources. The computationally demanding MLLM inference is offloaded to a third-party service, removing the need for powerful local GPUs and thus lowering the barrier to entry for researchers and practitioners. For institutions with the capacity for local MLLM deployment, this direct financial cost is effectively eliminated, reducing the expenditure to local inference costs alone.

Given the continuous downward trend in LLM API pricing and the proliferation of powerful open-source models, we believe the MLES paradigm is not only viable but also a highly practical and sustainable approach for developing the next generation of trustworthy AI control systems.

## A.3 LIMITATION

**Task-specific design of behavioral evidence.** The MLES framework leverages Behavioral Evidence (BE) to analyze policy behavior and guide targeted improvements, thereby accelerating policy discovery. A current limitation, however, is that the design of efficient BE remains a task-specific, manual process. For MLES to achieve optimal performance, the BE must be sufficiently informative to capture the nuances of policy failures. In this paper, we design BEs from a human perspective for the Lunar Lander and Car Racing tasks and successfully apply them within MLES, achieving high performance. However, for a new task, the design of an appropriate BE-generation pipeline is required, introducing design overhead.

We foresee three promising avenues to reduce or eliminate this manual effort:

- **First**, by reusing and fine-tuning the BE-generation pipeline proposed in this paper. As detailed in Appendix D.2, methods such as frame stacking are well-suited for tasks with relatively static backgrounds, while trajectory mapping is effective for tasks focused on object motion, such as vehicle or drone control. These pipelines can serve as robust starting points for new environments.
- **Second**, by leveraging video-format BE, such as raw video clips of agent rollouts. This approach would provide rich, detailed information with minimal design effort but introduces a trade-off with computational cost, primarily due to the high token count associated with processing image sequences in MLLMs. The feasibility of this approach will likely improve as the cost of MLLM inference decreases over time.
- **Third**, a more ambitious direction is to empower the MLES framework to automatically design its own BE. Analogous to the way MLES designs programmatic policies, an outer design loop could be added to the framework to optimize the BE-generation pipeline itself. This can be framed as a meta-learning problem, where the outer loop discovers an optimal BE pipeline that provides maximally informative evidence for the inner policy evolution loop, thereby minimizing the need for human intervention.

**Dependency on multimodal large language models.** The performance ceiling of MLES is inherently coupled with the capabilities of its underlying MLLMs. The framework’s ability to understand complex failure modes is contingent on the MLLM’s visual reasoning, while the quality of generated policies depends on its code generation and logical deduction abilities.

While this dependency is a limitation, it also means that MLES is designed to continuously improve as foundational models advance. As MLLMs become more capable, the performance, efficiency, and scalability of MLES will naturally be enhanced. This symbiotic relationship positions MLES not as a static method, but as an evolving paradigm poised to leverage future breakthroughs in generative AI. Future work could also explore systematically evaluating the impact of different open-source and proprietary MLLMs within the MLES framework to better understand this relationship.

## B ADDITIONAL EXPERIMENT RESULTS

### B.1 HYPERPARAMETERS FOR EXPERIMENTAL SETUP

This subsection presents the hyperparameters used in our experiments involving MLES, EoH, DQN, and PPO. The experiments were implemented in Python and executed on a single CPU (Intel i9-13980HX) with 32GB of RAM. Table 3 details the hyperparameters for MLES and EoH, where identical settings were applied to ensure a fair comparison, based on the configurations from the EoH paper (Liu et al., 2024a). Tables 4 and 5 present the hyperparameter settings for DQN and PPO across two tasks, respectively. Tables 6 and 7 show the network architectures used for DQN and PPO on two benchmarks. To ensure a fair comparison, we maintained identical network structures (with approximately equal parameter counts) for DQN and PPO in terms of feature processing and decision-making, excluding the output layers.

Notably, while the PPO agent utilizes a densely parameterized neural network (as shown in Table 7), the programmatic policies discovered by MLES achieve comparable performance with a significantly lower computational footprint. This stark difference in complexity makes MLES policies exceptionally well-suited for deployment in real-world applications, particularly in resource-constrained environments such as embedded systems or microcontrollers.

Table 3: Hyperparameter settings for MLES and EoH.

| Hyperparameter  | Parameter Description                                            | Value       |
|-----------------|------------------------------------------------------------------|-------------|
| $m$             | Number of parents selected in each evolution step                | 2           |
| $N$             | Population size                                                  | 16          |
| LLM             | Version of LLM used in the evolutionary operators                | GPT-4o-mini |
| LLM temperature | Hyperparameter controlling the randomness of LLM text generation | 1           |

Table 4: DQN Hyperparameters for Lunar Lander and Car Racing Tasks

| Hyperparameter                        | Lunar Lander | Car Racing           |
|---------------------------------------|--------------|----------------------|
| Action Space Dimension                | 4            | 9 (Discrete actions) |
| Replay Buffer Capacity                | 10,000       | 30,000               |
| Batch Size                            | 128          | 128                  |
| Discount Factor                       | 0.99         | 0.98                 |
| Initial $\epsilon$                    | 1.0          | 1.0                  |
| Minimum $\epsilon$                    | 0.01         | 0.1                  |
| $\epsilon$ Decay Rate                 | 0.9995       | 0.995                |
| Target Network Update Rate ( $\tau$ ) | 0.01         | 0.01                 |
| Optimizer Type                        | Adam         | Adam                 |
| Learning Rate                         | 0.001        | 0.0005               |

Table 5: PPO Hyperparameters for Lunar Lander and Car Racing Tasks

| Parameter                                  | Lunar Lander | Car Racing |
|--------------------------------------------|--------------|------------|
| Discount Factor                            | 0.99         | 0.99       |
| Generalized Advantage Estimation Parameter | 0.95         | 0.95       |
| PPO Clip                                   | 0.2          | 0.2        |
| Entropy Coefficient                        | 0.01         | 0.01       |
| Critic Coefficient                         | 0.5          | 0.5        |
| Max Gradient Norm                          | 0.5          | 0.5        |
| Batch Size                                 | 256          | 256        |
| Mini Batch Size                            | 64           | 64         |
| Learning Rate                              | 3e-5         | 3e-5       |

Table 6: Network Architectures for DQN and PPO on Lunar Lander Task

| Component    | Layer Type       | DQN Configuration                 | PPO Configuration |
|--------------|------------------|-----------------------------------|-------------------|
| Input Layer  | State Dimension  | 8 (environment observation space) |                   |
| Hidden Layer | Layer 1          | Linear(512)→ReLU                  |                   |
|              | Layer 2          | Linear(512)→ReLU                  |                   |
| Output Layer | Policy Head      | Linear(4)                         |                   |
|              | Value Head       | N/A                               | Linear(1)         |
| Activation   | Hidden Layers    | ReLU                              |                   |
|              | Output Layer     | Linear                            |                   |
| Parameters   | Total Parameters | 269,316                           | 269,829           |

Table 7: Network Architectures for DQN and PPO on Car Racing Task

| Component            | Specification | DQN                                                                          | PPO                                                                                      |
|----------------------|---------------|------------------------------------------------------------------------------|------------------------------------------------------------------------------------------|
| Input Layer          | Dimensions    | 96×96×3 (Current frame) + 96×96×3 (Last frame) + 1 (Speed) + 3 (Last action) |                                                                                          |
| Convolutional Layers | Layer 1       | Conv2d(3→32, kernel=8×8, stride=4) → ReLU                                    |                                                                                          |
|                      | Layer 2       | Conv2d(32→64, kernel=4×4, stride=2) → ReLU                                   |                                                                                          |
|                      | Layer 3       | Conv2d(64→64, kernel=3×3, stride=1) → ReLU                                   |                                                                                          |
| Shared Network       | Architecture  | Linear(8196→512)→ReLU                                                        | Linear(8196→512)→ReLU                                                                    |
| Policy Head          | Architecture  | Linear(512→9)<br>Discrete actions (9)                                        | Linear(512→256) → ReLU → Linear(256→3)<br>Continuous actions (steering, throttle, brake) |
| Value Head           | Architecture  | N/A                                                                          | Linear(512→256) → ReLU → Linear(256→1)                                                   |
| Activation           | Hidden        | ReLU                                                                         |                                                                                          |
|                      | Output        | Linear                                                                       | Policy: Tanh/Sigmoid, Value: Linear                                                      |
| Parameters           | Total         | 4,277,417                                                                    | 4,536,484                                                                                |

## B.2 ANALYSIS OF COMPUTATIONAL TIME (WALL-CLOCK TIME)

In this section, we evaluate the wall-clock time of MLES against baselines to assess its computational efficiency in discovering viable policies. All experiments are conducted on a single machine equipped with an Intel Core i9-13980HX processor, 32 GB of RAM, and an NVIDIA GeForce RTX 4060 GPU.

We measure efficiency using two primary metrics:

- **Total Time:** The full runtime of a method until a predefined budget of environment resets is exhausted. This metric reflects the overall computational cost for a comparable amount of exploration.
- **Time to Threshold:** The time elapsed from the start of a run until a method first discovers a policy meeting a predetermined performance threshold. This metric quantifies the speed at which



a method solves the task. The thresholds are a score of 1.00 for Lunar Lander and 95.0 for Car Racing.

The computational time for DQN and PPO primarily consists of GPU-accelerated neural network training and CPU-based environment rollouts. For MLES and EoH, the time is composed of: (1) *Sample time*, the latency for OpenAI API calls (using gpt-4o-mini), encompassing network latency and MLLM inference; (2) *Eval time*, the CPU time for policy evaluation in the environment; and (3) minor overhead for population management.

Table 8: Wall-Clock Time Comparison of MLES and Baselines

| Task         | Method | Total Time      | Time to Threshold | Remarks                            |
|--------------|--------|-----------------|-------------------|------------------------------------|
| Lunar Lander | DQN    | 1h 55min        | <b>0h 31min</b>   |                                    |
|              | PPO    | <b>1h 44min</b> | 1h 11min          |                                    |
|              | EoH    | 1h 49min        | 0h 57min          | Sample time:~20s; Eval time: ~4.5s |
|              | MLES   | 1h 50min        | 0h 36min          | Sample time:~20s; Eval time: ~4.5s |
| Car Racing   | DQN    | 41h 58min       | —                 |                                    |
|              | PPO    | 32h 37min       | 12h 0min          |                                    |
|              | EoH    | 6h 47min        | —                 | Sample time:~20s; Eval time: ~45s  |
|              | MLES   | <b>6h 28min</b> | <b>3h 16min</b>   | Sample time:~20s; Eval time: ~45s  |

*Note: “—” indicates that the method failed to reach the performance threshold within the given time budget. The “Sample time” and “Eval time” in the Remarks column refer to the approximate durations for a single policy generation (API call) and its subsequent evaluation, respectively.*

Table 8 presents the wall-clock time comparison. Time to Threshold The results demonstrate that MLES is highly competitive in computational efficiency, even outperforming traditional DRL baselines on key metrics. Several key observations and insights can be drawn from these results:

**1. Efficiency from inherent parallelism.** For the Car Racing task, both MLES and EoH exhibit significantly lower Total Time than the DRL methods, an advantage stemming from the inherently parallel nature of the EC framework. In our implementation, policy sampling and evaluation for MLES and EoH are parallelized across eight processes. This architecture is highly effective for tasks with long evaluation times (approx. 45s per rollout in Car Racing), allowing the population to be evaluated concurrently. Conversely, for Lunar Lander, where Eval time is much shorter (approx. 4.5s), the benefits of parallelization are less pronounced, and total times are comparable across all methods. This scalability demonstrates that the MLES framework is well-positioned to tackle more computationally intensive tasks without facing prohibitive runtime bottlenecks.

**2. Superior Time to Threshold.** MLES demonstrates exceptional performance on the Time to Threshold metric, which measures the speed of problem-solving. On Lunar Lander, MLES (36min) is competitive with the fastest baseline, DQN (31min), and substantially faster than PPO (1h 11min). This advantage is magnified in Car Racing, where MLES reaches the threshold in just 3h 16min, nearly four times faster than PPO (12h). This superior efficiency is attributable to two factors: (1) the rapid exploration rate enabled by the parallel EC framework, and (2) the enhanced search effectiveness from targeted policy improvements, which are guided by our visual feedback-driven behavior analysis.

**3. Negligible overhead from multimodal inputs.** A key finding is that introducing image-based behavioral evidence in MLES does not incur a significant latency penalty in API calls compared to the text-only EoH. The Sample time for both remained around 20 seconds. This demonstrates that the inference efficiency of current MLLMs like gpt-4o-mini is sufficient to support our framework without creating a bottleneck, rendering the rich guidance from multimodal feedback a computationally viable enhancement.

### B.3 INFLUENCE OF BEHAVIORAL EVIDENCE AND PROMPT ENGINEERING ON POLICY DISCOVERY

This section investigates the influence of different forms of BE and prompt engineering strategies on the policy discovery process. We employ M1 as the test operator and construct various few-shot prompts, incorporating diverse forms of BE and specific instructions. Specifically, we evaluate the following five configurations:

- **M1:** The baseline operator derived from EoH, without any additional input.

- **M1\_M**: Incorporates image inputs. The prompt explicitly instructs the MLLM to provide a detailed description and analysis of the image content.
- **M1\_M<sup>†</sup>**: Includes image input, but without explicit instructions for description or analysis. The LLM directly optimizes the policy based on the provided image.
- **M1\_T**: Introduces textual trajectory coordinates, as illustrated in Fig. 7(c). The prompt explicitly instructs the MLLM to describe and analyze this information in detail.
- **M1\_M<sup>‡</sup>**: Employs a two-stage process. The image is first processed by an MLLM 1 to generate a detailed textual description, which is then passed to MLLM 2 for M1-level reasoning and policy generation. This configuration is akin to using an LLM that does not have direct access to the image.

To quantitatively assess the impact of these different BE forms and prompt instructions, we initialized our experiments with five distinct populations, each exhibiting significant evolutionary potential. These populations are carefully selected from an established policy evolution process by MLES for the Lunar Lander task. Specifically, we identify five generations that have previously demonstrated substantial progress and select their immediate preceding populations as our initial populations. This selection criterion ensures that our starting points possess considerable room for improvement, allowing for clearer observation of the operators’ effects. Each M1 operator variant is applied to these populations for two generations. The entire experiment is repeated five times to ensure statistical robustness. We measure the impact by observing both the average performance improvement of the population and the improvement of the best policy within each population.

Table 9: Average performance improvement in population and best policy across different configurations for the M1 operator.

|                         | M1      | M1_M    | M1_M <sup>†</sup> | M1_T    | M1_M <sup>‡</sup> |
|-------------------------|---------|---------|-------------------|---------|-------------------|
| Population improvement  | +19.43% | +24.55% | +20.21%           | +20.29% | +19.73%           |
| Best policy improvement | +1.18%  | +4.39%  | +2.37%            | +3.64%  | +2.95%            |

Table 9 summarizes the average improvements in population performance and best policy performance brought about by these operators. Several key observations and insights can be drawn from these results:

**1. Integrating BE significantly boosts policy discovery efficiency.** A foundational finding is that the incorporation of BE consistently leads to improved performance compared to the baseline M1 operator. The baseline M1, without any BE, achieves a population improvement of +19.43% and a best policy improvement of +1.18%. In contrast, all configurations that utilize BE (M1\_M, M1\_M<sup>†</sup>, M1\_T, M1\_M<sup>‡</sup>) exhibit higher gains in both population and best policy performance. For instance, M1\_M demonstrates the highest population improvement at +24.55% and also the most significant best policy improvement at +4.39%. This clearly indicates that providing MLLMs with relevant behavioral evidence significantly aids in fine-grained policy evaluation and enables more targeted policy optimization. The evidence acts as a crucial guide, steering the MLLM toward more effective policy spaces.

**2. The impact of interpretability and richness of BE.** Both M1\_M and M1\_T demonstrate substantial improvements in best policy performance, with +4.39% and +3.64%, respectively. While both forms of BE prove beneficial, the visual representation of the lander’s behavior and posture in images is arguably more expressive, intuitive, and easier for the MLLM to interpret than raw textual state traces. This superior interpretability and rich expressiveness enable the MLLM to analyze policy behavioral patterns more deeply. These results support our claim, as discussed in Appendix D.1, that the most crucial aspect of BE is the quality and inherent interpretability of the information it conveys, along with how effectively this information can be leveraged by MLLMs for comprehensive behavioral analysis and subsequent policy refinement. The richer, more direct semantics embedded in visual data appear to offer a distinct advantage.

**3. The benefit of direct image input.** Comparing M1\_M (direct image input) with M1\_M<sup>‡</sup> (two-stage processing where an image is first described by an MLLM into text, then passed to the policy generator), we observe a clear performance disparity. M1\_M achieves a population improvement of +24.55% and a best policy improvement of +4.39%, whereas M1\_M<sup>‡</sup> yields slightly lower gains at +19.73% for population and +2.95% for best policy. When an image transforms into a textual description by another model, even if that description is “detailed,” there is an inherent risk of information loss or misinterpretation. For an MLLM serving as a policy generator, directly accessing the raw image appears more advantageous than relying on a cascaded interpretation. This suggests that the rich, nuanced information present in the original image may be difficult to fully capture and convey through an intermediate textual representation, at least with current LLM capabilities. This outcome highlights the value of direct multimodal processing for inherently multimodal tasks, as it avoids potential bottlenecks and accumulated errors introduced by an intermediate textualization step.

**4. The advantage of explicit instructions for behavioral analysis.** The contrast between  $M1\_M$  and  $M1\_M^\dagger$  strongly highlights the advantage of providing explicit instructions for behavior analysis within the prompt.  $M1\_M$  consistently performs better in both population (+24.55%) and best policy (+4.39%) improvement compared to  $M1\_M^\dagger$  (+20.21% and +2.37% respectively). Both configurations receive image input, but  $M1\_M$  explicitly instructs the LLM to provide a detailed description and analysis of the image, while  $M1\_M^\dagger$  does not. This gap emphasizes that while MLLMs can implicitly derive information from raw image input to aid inference, explicit directives to analyze BE can provide rich, relevant context. This promotes the activation of pertinent knowledge within the MLLM. By encouraging a “thinking aloud” process, such instructions enable the LLM to synthesize more comprehensive and actionable insights, which are subsequently utilized to generate more effective policy modifications. This finding is consistent with observations in Chain of Thought and similar works Yu et al. (2025); Wang & Venkatesh (2025).

In summary, these experiments underscore that both the form of BE and the strategy of prompt engineering are crucial factors in maximizing the effectiveness of MLES-driven policy discovery. A well-crafted context, combining expressive and interpretable BE with clearly instructed analytical processes during MLLM inference, significantly improves reasoning and enables more targeted and effective policy optimization. Our findings suggest that for complex tasks requiring a nuanced understanding of behavior, direct multimodal input, coupled with explicit analytical prompts, represents a superior approach.

#### B.4 ABLATION STUDY

We conduct an ablation study to assess the individual contributions and the collective synergy of the key components within the MLES framework. This study evaluates variants of MLES where specific operators or mechanisms are removed. For clarity, we define the key variants as follows:

- $MLES^\dagger$  (w/o Exploration): This variant removes both exploration operators (E1 and E2). The policy search relies solely on refining existing policies based on multimodal feedback ( $M1\_M$  and  $M2\_M$ ), without generating fundamentally new strategies or generalizing from multiple parents.
- $MLES^\ddagger$  (w/o Multimodal Modification): This variant removes both multimodal modification operators ( $M1\_M$  and  $M2\_M$ ). The policy search proceeds using only the code and thoughts of parent policies (E1 and E2), foregoing any targeted refinement based on BE.
- w/o Thought: This variant removes the natural language “Thought” description from the prompt. The MLLMs must infer the policy’s logic and intent solely from the raw code, without the high-level semantic guidance that explains the strategy.

We also evaluate the removal of each of the four operators individually, denoted by the prefix “w/o” (e.g., w/o E1). The average performance across three independent runs for each variant is summarized in Table 10. The metric  $\Delta\text{Perf}(\%)$  quantifies the performance degradation relative to the full MLES framework. As shown in Table 10, each component contributes significantly to the overall performance of the MLES framework.

Table 10: Ablation study results on two control tasks.

| Method          | Lunar Lander |                         | Car Racing |                         |
|-----------------|--------------|-------------------------|------------|-------------------------|
|                 | Average      | $\Delta\text{Perf}(\%)$ | Average    | $\Delta\text{Perf}(\%)$ |
| MLES            | 1.090        | 0.00%                   | 98.70      | 0.00%                   |
| w/o E1          | 1.093        | +0.17%                  | 87.53      | -11.32%                 |
| w/o E2          | 1.082        | -0.68%                  | 89.04      | -9.79%                  |
| $MLES^\dagger$  | 1.081        | -0.77%                  | 85.17      | -13.71%                 |
| w/o $M1\_M$     | 0.997        | -8.54%                  | 86.71      | -12.15%                 |
| w/o $M2\_M$     | 1.020        | -6.41%                  | 84.77      | -14.12%                 |
| $MLES^\ddagger$ | 0.629        | -42.24%                 | 83.16      | -15.75%                 |
| w/o Thought     | 1.038        | -4.75%                  | 88.80      | -10.04%                 |

**The critical role of multimodal modification.** The most pronounced performance degradation is observed in the  $MLES^\ddagger$  variant, where removing both  $M1\_M$  and  $M2\_M$  results in a catastrophic drop of 42.24% in Lunar Lander and a significant 15.75% decline in Car Racing. This finding strongly validates our core hypothesis: leveraging BE for targeted policy refinement is the primary driver of MLES’s effectiveness. Without the ability to analyze behavioral shortcomings ( $M1\_M$ ) and fine-tune parameters ( $M2\_M$ ) based on concrete execution feedback, the policy search becomes vastly less efficient and is prone to stagnation.

**The importance of exploration.** The removal of exploration operators (MLES<sup>†</sup>) also leads to a notable performance decline, especially a 13.71% drop in the more complex Car Racing environment. This indicates that operators designed to synthesize fundamentally new strategies (E1) and generalize from successful existing ones (E2) are essential for navigating challenging policy spaces and escaping local optima. Interestingly, the removal of E1 in the simpler Lunar Lander task did not degrade performance but instead yielded a slight improvement (+0.17%). A plausible explanation is that for a less complex problem space, the aggressive exploration of E1 might introduce counterproductive variance. Given a fixed search budget, its absence allows the search to focus more effectively on refining already promising solutions. This strongly contrasts with its critical role in Car Racing, underscoring that E1’s contribution is most significant in tasks demanding broad exploration.

**Synergistic effect.** While both operator types are important, the multimodal modification operators demonstrate a more foundational impact. However, the full MLES model outperforms all ablated variants, underscoring the synergistic relationship between exploration and modification. The exploration operators (E1, E2) act as the “engine of creativity,” broadening the search by introducing diverse policy structures into the population. Subsequently, the multimodal modification operators (M1\_M, M2\_M) act as the “engine of refinement,” grounding the search by improving these policies based on empirical evidence.

These results underscore the importance of both exploration operators and multimodal modification operators. By integrating these two aspects, MLES effectively balances a broad, creative search of the policy space with a deep, evidence-driven refinement of promising solutions. This powerful combination is key to its ability to efficiently discover high-performing policies.

**The role of Thought.** A design choice in MLES is to represent policies as a combination of executable code and a natural language “Thought” describing the underlying strategy. Removing this “Thought” leads to a substantial performance drop of 4.75% on Lunar Lander and 10.04% on Car Racing. This underscores the importance of semantic guidance, which helps MLLMs to quickly comprehend the policy and perform a more coherent search in the language space, thereby accelerating the policy discovery process. This observation aligns with prior findings in the EoH paper Liu et al. (2024a).

## B.5 GENERALIZATION VIA POLICY ENSEMBLE

Finding a single policy that generalizes perfectly to all possible scenarios is often unattainable in practice. The performance degradation on test instances, observed across all methods in Table 1, illustrates this common generalization gap. This gap is not necessarily a flaw of any specific method, but rather an inherent characteristic of complex problems that demand case-specific solutions.

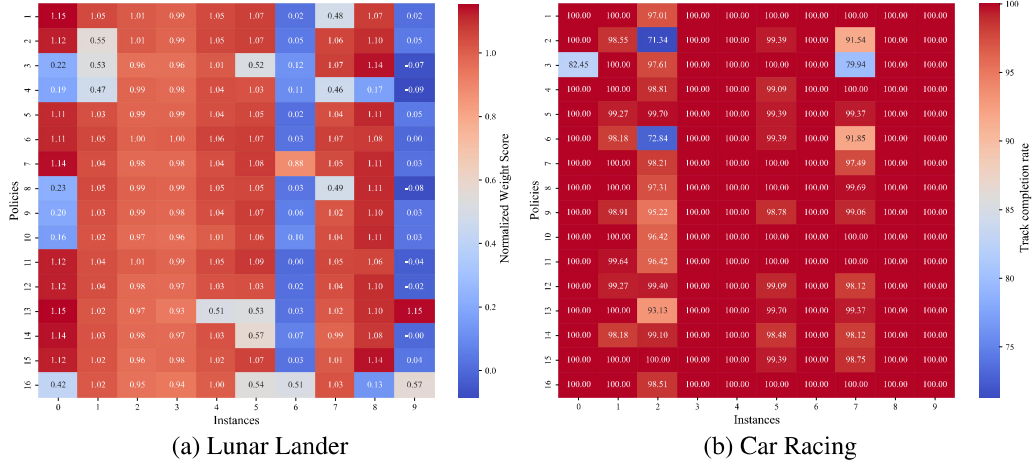

Figure 6: Performance heatmaps of the final MLES policy populations on (a) Lunar Lander and (b) Car Racing. Each row represents one of the 16 final policies, and each column represents one of 10 distinct test instances. The varied color patterns across rows for both tasks vividly illustrate the strategic diversity and complementary strengths within the discovered policy pools.

A significant, inherent advantage of MLES is that its evolutionary process produces not just a single policy, but a diverse population of high-performing candidate policies. We present performance heatmaps in Fig. 6, which plots the scores of each policy in the final population across ten distinct test instances for two tasks. The varied color patterns illustrate that the discovered policies possess complementary strengths: some policies

excel in particularly challenging instances where others struggle. This diversity confirms that MLES effectively explores and maintains a rich portfolio of distinct policies. Consequently, this presents a compelling opportunity to enhance generalization by applying ensemble decision-making to this set of high-performing, complementary policies.

To validate this potential, we conduct an investigation using a straightforward ensembling strategy, with the results reported in Table 11. For the final policy population, the ensemble’s action is selected by majority vote (for discrete tasks) or by averaging the outputs (for continuous tasks), and each policy is assigned an equal weight.  $\text{MLES}^\dagger$  and  $\text{EoH}^\dagger$  denote the ensemble versions of the respective methods.

Table 11: Effect of Policy Ensemble on LES Performance

| Method                | Lunar Lander |        | Car Racing |         |
|-----------------------|--------------|--------|------------|---------|
|                       | Train        | Test   | Train      | Test    |
| EoH                   | 1.053        | 0.776  | 89.808     | 79.286  |
| $\text{EoH}^\dagger$  | 0.938↓       | 0.856↑ | 82.978↓    | 84.567↑ |
| MLES                  | 1.090        | 0.819  | 98.704     | 96.358  |
| $\text{MLES}^\dagger$ | 1.032↓       | 0.901↑ | 96.904↓    | 97.921↑ |

The results are highly encouraging. Despite the simplicity of the ensemble method, it produced a significant improvement in test performance for both MLES and EoH. It is worth clarifying that a slight decline in training performance is also observed after ensembling. This outcome is a well-known characteristic of the bias-variance tradeoff, where ensembling acts as a form of regularization to improve generalization, sometimes at the cost of slightly increased bias on the training set.

Crucially, the complementarity of the policies in the population is achieved organically, without employing any explicit diversity-preservation techniques common in the EC field. This indicates a substantial, yet-to-be-tapped potential for further improving MLES to address generalization issues. Looking forward, we believe this provides a promising direction for future work, which could focus on explicitly cultivating a “specialist team” of policies. This might involve exploring more advanced techniques, such as:

- **Feature-Aware Instance Clustering:** Automatically grouping similar problem instances based on their features to train or select specialized policies for each cluster.
- **Cooperative Co-evolution:** Designing efficient evolutionary mechanisms that encourage the policy population to collectively cover the full spectrum of training instances, rewarding policies for succeeding where others fail.
- **Adaptive Collaborative Decision-Making:** Creating dynamic ensembling mechanisms where policies “vote” on the final action with varying confidence levels based on the current state.

Overall, while not the primary focus of this paper, MLES demonstrates inherent properties and substantial potential that could be harnessed to tackle the challenge of generalization.

## C DETAILS OF QUANTITATIVE METRICS IN MLES

### C.1 QUANTITATIVE METRICS FOR POLICY EVALUATION IN MLES

In MLES, quantitative metrics serve as indicators of policy performance, analogous to the episode reward function in DRL. These metrics provide a consistent basis for ranking and selecting candidates during the policy evolution process. Unlike DRL, where each action is evaluated with immediate rewards in an online fashion, MLES evaluates the overall performance of a policy across a set of instances. In other words, MLES utilizes sparse rewards to guide policy learning, focusing on the final performance outcome.

This approach offers a practical advantage in that it eliminates the need for frequent manual design of intermediate rewards. We only need to focus on transforming the ultimate task goal into an evaluable metric, which can then support automated policy discovery. This not only simplifies the process but also alleviates the computational burden associated with reward design. However, this comes with the challenge of lacking direct evaluation of intermediate behaviors, which may potentially lead to issues such as reward hacking. To address this limitation, MLES incorporates *behavioral evidence* (BE), which supplements the evaluation of intermediate actions. A more detailed discussion of this can be found in Section 2.3 and Appendix D.

Given a set of training instances, MLES aims to maximize (or minimize) the quantitative metric across the policies in its policy pool. During the evaluation process, the performance of a policy is typically assessed in

parallel across all relevant instances, and the overall quantitative metric is computed as a weighted average of the metrics for each instance. Through iterative optimization, this process generates policies that are well-suited to instances drawn from the same distribution as the training instances.

## C.2 QUANTITATIVE METRICS FOR BENCHMARK TASKS

This subsection outlines the quantitative metrics employed for evaluating policies in the Lunar Lander and Car Racing tasks.

**Lunar Lander** The quantitative metric for evaluating performance in the Lunar Lander task is the Normalized Weight Score (NWS), which is defined as follows:

$$\text{NWS} = \frac{R}{200} \times 0.6 + (1 - \min(\frac{C}{100}, 1)) \times 0.2 + S \times 0.2 \quad (2)$$

where  $R$  is the mean episode reward,  $C$  is the mean fuel consumption, and  $S$  is the success rate of completing the landing task, all computed over multiple instances.

For each training instance, the episode reward is calculated by summing the rewards across all steps taken by the policy during execution. The reward for each step is determined by the following criteria:

- Reward increases/decreases based on the proximity to the landing pad.
- Reward increases/decreases based on the lander’s speed (slower movement is rewarded).
- Reward decreases based on the tilt of the lander (less tilt is better).
- An additional reward of 10 points is awarded for each leg in contact with the ground.
- Penalties are imposed for using side or main engines during flight (-0.03 and -0.3 points per frame, respectively).
- A penalty of -100 points is incurred for crashing, and a bonus of +100 points is awarded for a successful landing.

A policy is considered successful if it achieves an episode reward of at least 200, which contributes to the first term in the NWS calculation. The policy’s success is also determined by its ability to land safely, which is reflected in the third term of the NWS. A policy with an NWS greater than 1 indicates a 100% safe landing rate, with larger values indicating more fuel-efficient landings. To ensure fair comparison, DRL algorithms also adopt the default reward function as described above.

**Car Racing** Regarding the Car Racing task, the Gym environment provides a reward of -0.1 points for each frame, with an additional reward of +1000/ $N$  for each track tile visited, where  $N$  is the total number of tiles in the track. This reward function incentivizes agents to complete the race track efficiently while avoiding driving off the course.

For the Car Racing task, we intuitively use the track completion rate as the quantitative metric for each instance. MLES aims to maximize the mean track completion rate across the training instances as its objective for policy discovery. In our experiment, DRL adopts the default reward function from the Gym environment, as described above.

## D THE FORMATS AND NECESSITY OF BEHAVIOR EVIDENCE

This section provides a detailed discussion of the potential formats of Behavior Evidence (BE) and the construction techniques involved, along with the specific forms adopted in this work and the rationale behind our choices.

### D.1 FORMATS OF BEHAVIOR EVIDENCE

The primary objective of BE is to represent the behavior patterns associated with a given policy, thereby helping MLLMs identify policy shortcomings and facilitate subsequent improvements. BE serves as a crucial supplement to the evaluation of intermediate actions, addressing the inherent limitations of purely quantitative metrics such as episode reward and success rate, which often fail to provide granular insights into policy execution.

The precise format of BE is secondary to the quality and interpretability of the information it conveys, and how effectively this information can be leveraged by MLLMs. MLLM training paradigms, relying on human-provided images and corresponding natural language descriptions, progressively align model capabilities with human

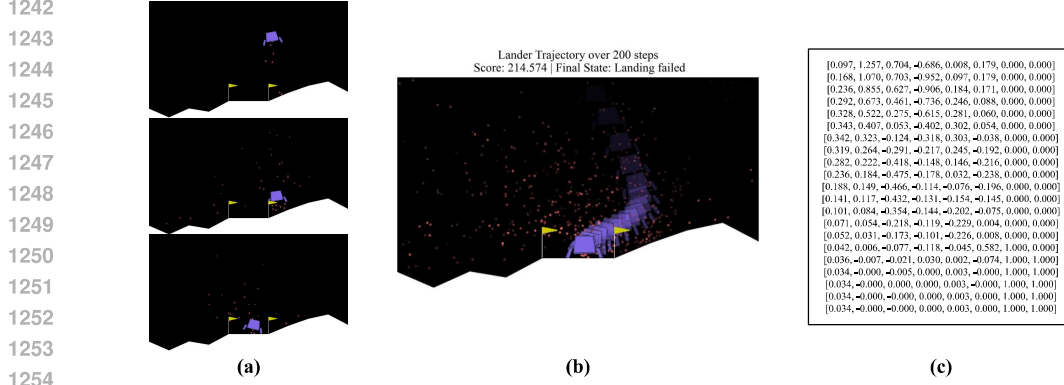

Figure 7: Examples of BE in the Lunar Lander task. (a) Trajectory videos visualizing the agent’s motion over time. (b) Pose overlays summarizing sequential states in a single image. (c) State traces presenting a symbolic representation of the agent’s behavior.

understanding. As evidenced by related work, current MLLMs demonstrate a level of visual comprehension closely mirroring human perception, enabling them to interpret information in a semantically meaningful way.

Fig. 7 illustrates three potential BE formats within the context of the Lunar Lander task: videos, images, and textual state traces. While these formats convey the same underlying information, their interpretability and computational overhead for MLLM input vary significantly. Videos offer a complete visualization of the entire process but incur substantial computational expense. With appropriate preprocessing, images can effectively convey the control process while maintaining relatively low computational costs. Conversely, textual descriptions, though offering the lowest computational cost, are less intuitive for both human and MLLM interpretation, demanding greater cognitive effort for comprehension.

It is important to note that agent behaviors in numerous tasks are challenging to represent clearly using purely textual formats. For instance, in the Car Racing task within our benchmarks, coordinate-based trajectories or performance records in textual form fail to convey the intricate and subtle interactions between the car and the track. Such representations do not capture crucial nuances of how the agent controls its motion and the corresponding dynamic outcomes, which are vital for a comprehensive policy analysis. In contrast, visual representations offer significantly richer expressiveness for these dynamics, thereby facilitating better policy understanding by humans. As previously discussed, MLLMs can also leverage visual data to interpret and analyze the policy’s control process, thereby underpinning the visual feedback-driven behavior analysis within the MLES.

Furthermore, real-world control tasks, such as bipedal robot walking, drone stabilization, or autonomous driving, frequently involve complex dynamics that are inherently difficult to articulate or fully capture through textual means. Visual formats are therefore superior for conveying these complex behaviors. In our experiments, to strike a balance between comprehensibility for both humans and MLLMs and computational efficiency, we opt to employ images as the primary format for BE. The specific methodologies for constructing them are detailed in the subsequent section.

## D.2 BE FOR TWO BENCHMARKS

This section details the construction of BE for Lunar Lander and Car Racing tasks, addressing their unique characteristics.

**Lunar Lander.** The Lunar Lander task features a static background, with only the lander object in motion. Given this setup, we can effectively capture the entire behavioral pattern by using a frame stacking technique with transparency. As illustrated in Fig. 8, this process involves selecting frames at fixed intervals and applying a transparency effect to each one before stacking them. The resulting BE is a single image that visualizes the lander’s pose and trajectory at key moments, effectively compressing the time-series information of an entire episode into a compact, visual representation.

**Car Racing.** The Car Racing task is a top-down environment where the camera continuously follows the car, and the background is dynamic. For this reason, the frame stacking method is not applicable. Instead, we propose a BE construction method based on a global map and trajectory mapping, as shown in Fig. 9. The process begins by obtaining the complete coordinates of the track from the environment’s backend to construct a global



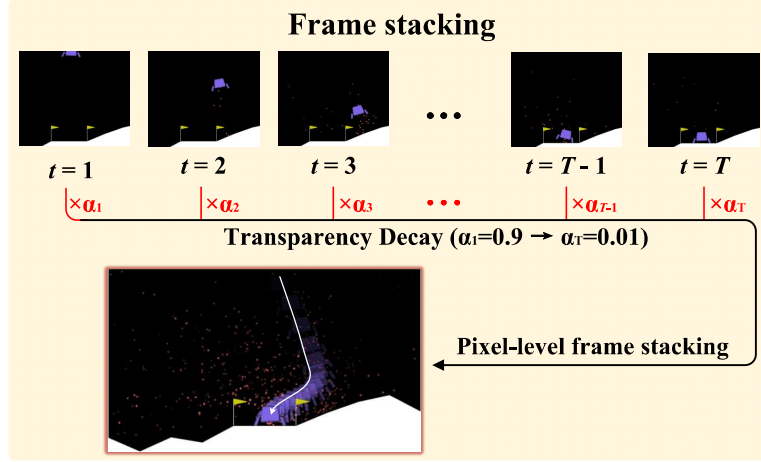

Figure 8: Frame stacking for BE construction for the Lunar Lander task

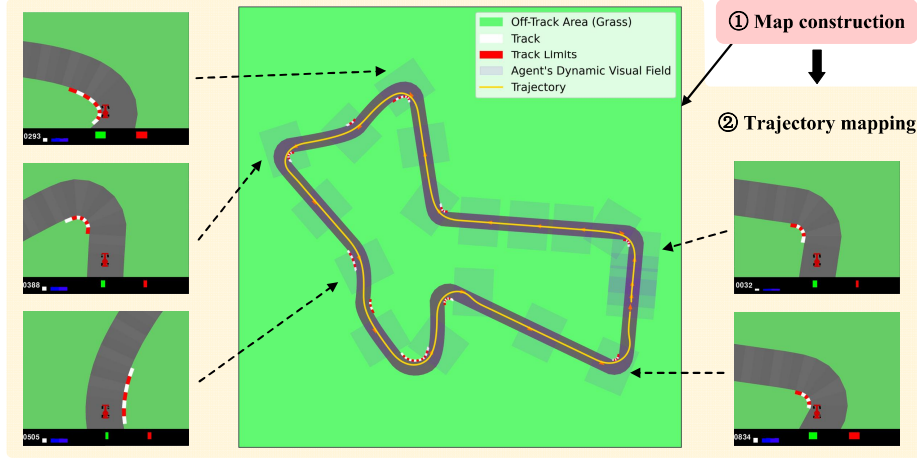

Figure 9: Trajectory mapping for BE construction for the Car racing task

track map. The car’s movement trajectory is then recorded throughout the episode and plotted onto this map upon completion. However, a simple trajectory alone is insufficient for explaining the policy’s decision-making process.

To address this limitation, we annotate the agent’s dynamic visual field at fixed environment step intervals along the trajectory. This enhancement provides two key benefits: (1) The density of the visual fields directly reflects the car’s speed: a denser distribution indicates a slower speed, and vice versa. (2) These visual fields provide crucial context, enabling MLLM to analyze the specific conditions that led to suboptimal actions, such as veering off the track. This targeted contextual information facilitates more precise reasoning and informed policy improvements.

### D.3 NECESSITY OF BE

This section presents a qualitative analysis of BE’s necessity, highlighting how it addresses a key limitation of quantitative metrics: their inability to evaluate the intermediate actions.

Fig. 10 illustrates the performance of policies designed by EoH and MLES on the same Car Racing track. Both policies achieve a perfect score, completing 100% of the track. However, a closer inspection of their trajectories reveals a critical difference. The EoH policy’s trajectory deviates significantly from the track on the final turn, only completing the course by executing a large corrective maneuver. This behavior is a classic example of “reward hacking,” a common issue in RL where agents exploit flawed reward functions to achieve a high score



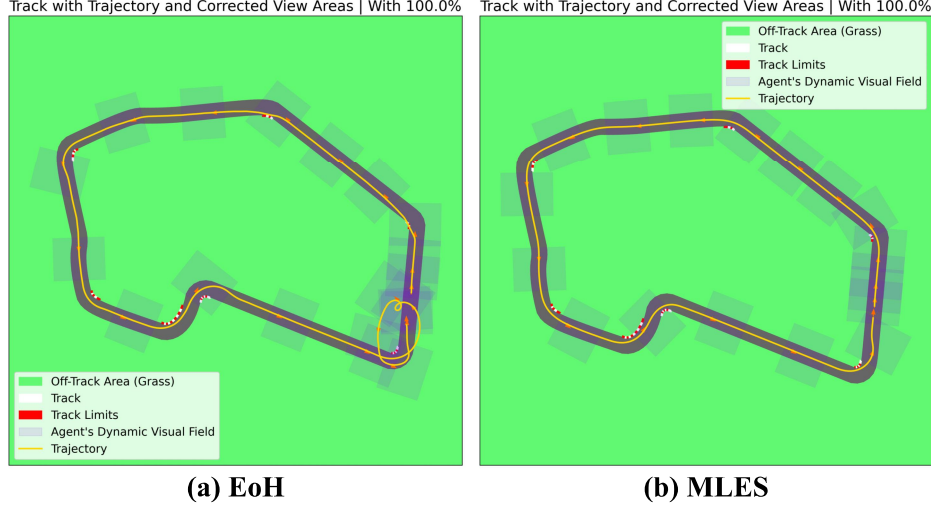

Figure 10: Trajectories of policies generated by EoH and MLES on a specific track, both achieving a perfect score

through suboptimal or unintended behaviors Skalse et al. (2022). In contrast, the MLES policy’s trajectory is both rational and efficient, closely mirroring a human driver’s racing line.

Because EoH’s evolutionary process is driven solely by a quantitative performance metric, it fails to evaluate the quality of the policy’s intermediate actions and thus cannot identify and correct such superficially high-performing but ultimately flawed policies. This leads to two significant problems: (1) Deceptively high-scoring policies can persist within the population, hindering the overall evolutionary progress. (2) Policies may achieve strong results on training instances but exhibit poor generalization to new, unseen instances.

In our approach, MLES utilizes BE as a crucial supplement to quantitative metrics, allowing MLLMs to perform in-depth behavioral analysis. This qualitative input enables the system to identify and proactively rectify these “fake-excellent” policies. Furthermore, for policies that are sound but underperforming, BE allows the MLLM to provide targeted feedback for specific improvements, thereby accelerating the policy discovery process. This highlights the indispensable role of BE in the LES paradigm for achieving robust and generalizable policy learning.

## E PROMPTS

### E.1 TEMPLATES FOR CONSTRUCTING PROMPTS FOR SPECIFIC OPERATORS

This section details the prompt templates utilized for policy generation within the MLES framework. Figs. 11, 12, 13, and 14 illustrate the specific prompt templates for operators E1, E2, M1.M, and M2.M, respectively. In all presented templates, black text indicates fixed components, red placeholders denote task-specific elements, and blue placeholders represent variables that evolve throughout the evolutionary process.

### E.2 TASK-SPECIFIC PROMPTS USED IN EXPERIMENTS

This section demonstrates the design of task descriptions and code templates for applying MLES, using two control problems from our experiments as examples. Briefly, the task description communicates the requirements for the control policy to be designed, while the code template defines the programmatic policy’s code interface that MLES needs to generate. Figs. 15 and 16 present the task descriptions provided to MLES for the Lunar Lander and Car Racing tasks, respectively. Figs. 17 and 18 show the corresponding code templates.

**Task description.** The task description serves as a problem statement for MLES, akin to an assignment given by a teacher to a student. First, we establish the overall context of the policy discovery task by clearly stating the objective: what control policy MLES needs to design. This primes the MLLMs to inherently prepare relevant knowledge for policy generation. Second, we explicitly articulate the desired characteristics of an optimal policy, guiding the LLM’s value alignment with human intent. Furthermore, we can provide a more detailed description of the control task to facilitate precise programming by MLES. For example, in Fig. 16, we elaborate

You are assigned as an expert to participate in the following task: “[Task Description Placeholder]”  
 I have “[Value Placeholder]” existing algorithms with their codes as follows:  
 The No. 1 algorithm and the corresponding code are:  
 “[Thought Placeholder]”  
 “[Code Placeholder]”  
 The No. 2 algorithm and the corresponding code are:  
 “[Thought Placeholder]”  
 “[Code Placeholder]”  
 ...  
 Please help me create a new algorithm that has a totally different form from the given ones.  
 1. First, describe your new algorithm and main steps in one sentence. The description must be inside within boxed {}.  
 2. Next, implement the following Python function:  
 “[Code Template Placeholder]”

Figure 11: Prompt template for the E1 operator.

You are assigned as an expert to participate in the following task: “[Task Description Placeholder]”  
 I have “[Value Placeholder]” existing algorithms with their codes as follows:  
 The No. 1 algorithm and the corresponding code are:  
 “[Thought Placeholder]”  
 “[Code Placeholder]”  
 The No. 2 algorithm and the corresponding code are:  
 “[Thought Placeholder]”  
 “[Code Placeholder]”  
 ...  
 Please help me create a new algorithm that has a totally different form from the given ones but can be motivated from them.  
 1. Firstly, identify the common backbone idea in the provided algorithms.  
 2. Secondly, based on the backbone idea describe your new algorithm in one sentence. The description must be inside within boxed {}.  
 3. Thirdly, implement the following Python function:  
 “[Code Template Placeholder]”

Figure 12: Prompt template for the E2 operator.

on observation details, such as the type of observation data and key visual elements. More comprehensive information tends to activate more relevant knowledge within the LLM.

**Code Template.** The code template defines the communication protocol and can optionally furnish MLES with expert knowledge. A code template typically consists of three parts: function declaration (function name and parameters), docstring, and function body.

Within the function declaration and docstring, we must pre-define the parameters that the policy and environment will exchange, ensuring compatibility with the environment’s interface. This involves: (1) identifying the parameters the environment or system provide to the policy and defining them as input variables in the function declaration; (2) detailing the type, dimension, range, and meaning of these input parameters in the docstring; and (3) clearly specifying the policy’s output in the docstring, typically the actions the agent can take. Additionally, we can incorporate prior knowledge and hints within the docstring to enhance the effectiveness of policies generated by MLES. As shown in Fig. 18, we can include “Notes” sections within the docstring to help MLES better understand the environment and offer specific guidance. For the function body, we can simply provide a return statement to ensure function completeness, or we can additionally include existing expert heuristics. Generally, providing some expert knowledge facilitates the policy discovery process of MLES.

You are assigned as an expert to participate in the following task: “[Task Description Placeholder]”  
 We have a working algorithm that needs optimization. Below are its concept, implementation, and execution results:  
 Concept: “[Thought Placeholder]”  
 Implementation: “[Code Placeholder]”  
 Execution results visualization for the algorithm: “[Behavioral Evidence Placeholder]”  
 Please start by providing a detailed description and analysis of the execution result, enclosed within single quotes (‘ ’). Next, based on your analysis, optimize the algorithm by following these steps:

1. Analyze why the results were produced in relation to the algorithm. Identify its weaknesses and areas for improvement, and enclose your analysis within square brackets [ ].
2. Propose an enhanced algorithm. Use concise language to describe the core idea of your algorithm, and enclose the core idea within curly braces { }.
3. Implement the enhanced algorithm using the following Python function template:  
 “[Code Template Placeholder]”

Figure 13: Prompt template for the M1\_M operator.

You are assigned as an expert to participate in the following task: “[Task Description Placeholder]”  
 We have a working algorithm that needs optimization. Below are its concept, implementation, and execution results:  
 Concept: “[Thought Placeholder]”  
 Implementation: “[Code Placeholder]”  
 Execution results visualization for the algorithm: “[Behavioral Evidence Placeholder]”  
 Please start by providing a detailed description and analysis of the execution result, enclosed within single quotes (‘ ’). Next, based on your analysis, optimize the algorithm by following these steps:

1. Parameter Analysis:
  - Identify all key parameters and their functions.
  - Determine which parameters should be modified to improve results.
  - Explain why these specific changes would help.
  - All content related to Parameter Analysis must be enclosed within brackets [ ].
2. Create a new algorithm that has a different parameter settings of the algorithm provided. Use concise language to describe the core idea of your algorithm, and enclose the core idea within curly braces { }.
3. Implement the enhanced algorithm using the following Python function template:  
 “[Code Template Placeholder]”

Figure 14: Prompt template for the M2\_M operator.

Implement a novel heuristic strategy function that guides the lander in selecting actions step-by-step to achieve a safe landing. At each step, an appropriate action could be chosen based on the lander’s current state and previous state, with the objective of reaching the target location in as few steps as possible. A ‘safe landing’ is defined as a touchdown with low vertical speed, upright orientation, and both angular velocity and angle close to zero, and both legs in contact with the ground.

Figure 15: Task description for the Lunar Lander task.

Write a Python function that serves as a control strategy for an agent in a top-down car racing environment.

#### Environment Overview

In this environment, the agent is required to drive a car along a race track. The primary objective is to cover as much of the track surface as possible before the time limit expires. To accomplish this, the agent needs to efficiently navigate the track by controlling the car's steering, throttle, and brake.

#### Observation Details

The agent's observation consists of a  $96 \times 96 \times 3$  RGB image representing the top-down view of the environment. The following key visual elements can be identified in this image:

- Car: Red (approximately  $[\approx 202, <10, <10]$ ).
- Track: Gray (approximately  $[\approx 102, \approx 102, \approx 102]$ ).
- Off-track grass: Greenish (approximately  $[\approx 102, \approx 204, \approx 102]$ ).
- Curbs (Sharp Turns): High-contrast red and white (approximately  $[>240, <20, <20]$  and  $[>240, >240, >240]$ ).

#### Inputs at Each Time Step

At every time step, the agent receives the following information:

- The current RGB observation of the environment.
- The current speed of the car.
- The previous RGB observation and the previous action taken by the agent.

#### Function Requirements

The Python function should incorporate a control policy that combines visual perception from the RGB observations and past information (previous observation and action). This policy should enable the agent to maintain optimal control of the car, keep the car on the track, and maximize the efficiency of lap completion.

Figure 16: Task description for the Car Racing task.

## F GENERATED PROGRAMMATIC POLICY

This section presents the best policies discovered by MLES, including the code, thought, and performance on a range of instances.

**Lunar Lander.** Fig. 19 shows the code for the best policy discovered for the Lunar Lander task. The thought of this policy provided by MLES is: "The core idea of the new algorithm is to further increase the sensitivity to vertical velocity, making the lander more responsive to abrupt changes, while also lowering the action thresholds to enable quicker decisions for stability control." Fig. 20 displays the performance of this policy across several instances, highlighting its ability to achieve safe landings consistently.

**Car Racing.** Fig. 21 shows the code for the best policy discovered for the Car Racing task. The core idea of this policy is to dynamically adjust the steering sensitivity and throttle response based on the car's speed and previous actions. This adjustment enables smoother control over the car's acceleration and deceleration, ensuring optimal performance during races. Furthermore, the policy incorporates an improved method for assessing track boundaries, focusing on smoother transitions between acceleration and deceleration. The policy intelligently uses the car's speed to modulate steering and throttle, allowing for better control in turns while avoiding overly sharp maneuvers that could destabilize the vehicle. Fig. 22 illustrates the policy's performance on several instances, demonstrating its ability to complete the race smoothly, with racing lines that resemble those of human drivers.

## G THE USE OF LARGE LANGUAGE MODELS

LLMs are utilized in two primary ways in this study: first, to serve as programmatic policy generators within the MLES framework; second, to help refine the manuscript by enhancing the clarity of the language, while the authors maintain full responsibility for the content and direction.

```

import numpy as np

def choose_action(s: list, last_action: int, s_pre: list) -> int:
    """
    Selects an action for the Lunar Lander to achieve a safe landing at the target location
    (0, 0).
    Args:
        s (list or np.ndarray): The current state of the lander. Elements:
            s[0] - horizontal position (x)
            s[1] - vertical position (y)
            s[2] - horizontal velocity (v_x)
            s[3] - vertical velocity (v_y)
            s[4] - angle (radians)
            s[5] - angular velocity
            s[6] - 1 if the first leg is in contact with the ground, else 0
            s[7] - 1 if the second leg is in contact with the ground, else 0
        last_action (int): The action taken in the previous step. One of:
            0 - do nothing
            1 - fire left orientation engine
            2 - fire main (upward) engine
            3 - fire right orientation engine
        s_pre (list or np.ndarray): The state of the lander *before* the last action was
            executed.
    Returns:
        int: The chosen action for the next step. One of:
            0 - do nothing
            1 - fire left orientation engine
            2 - fire main (upward) engine
            3 - fire right orientation engine
    """
    angle_targ = s[0] * 0.5 + s[2] * 1.0 # angle should point towards center
    if angle_targ > 0.4:
        angle_targ = 0.4 # more than 0.4 radians (22 degrees) is bad
    if angle_targ < -0.4:
        angle_targ = -0.4
    hover_targ = 0.55 * np.abs(
        s[0]
    ) # target y should be proportional to horizontal offset

    angle_todo = (angle_targ - s[4]) * 0.5 - (s[5]) * 1.0
    hover_todo = (hover_targ - s[1]) * 0.5 - (s[3]) * 0.5

    if s[6] or s[7]: # legs have contact
        angle_todo = 0
        hover_todo = (
            -(s[3]) * 0.5
        ) # override to reduce fall speed, that's all we need after contact

    a = 0
    if hover_todo > np.abs(angle_todo) and hover_todo > 0.05:
        a = 2
    elif angle_todo < -0.05:
        a = 3
    elif angle_todo > +0.05:
        a = 1
    return a

```

Figure 17: Code template for the Lunar lander Task

```

import numpy as np
import cv2
def choose_action(observation, car_speed, pre_action, pre_observation):
    """
    Determine the next action for the Car Racing agent.
    This function takes into account the current state (observation and speed), the previous
    action, and the previous observation.
    Notes:
    - The car in this environment is a powerful rear-wheel-drive vehicle. Avoid accelerating
      while turning sharply,
      as this can easily lead to loss of control.
    - Occasionally, track segments (e.g., after a U-turn) may appear in the observation but
      are not part of the immediate drivable path. These should be distinguished to avoid
      premature or incorrect decisions.
    - Avoid coming to a complete stop, as this may prevent the car from finishing the race.
    Args:
        observation (np.ndarray): The current state observed by the agent, represented as a 96
            x96 RGB image of the car and race track from a top-down view (shape: (96, 96, 3))
        car_speed (float): The current speed of the car.
        pre_action (np.ndarray): The action taken by the car in the previous step, represented
            as a 3-element array.
        pre_observation (np.ndarray): The observation received when the previous action was
            taken. It has the same shape and format as 'observation' (i.e., a 96x96 RGB image
            ).
    Returns:
        np.ndarray: The action selected by the agent for the next step, represented as an
            array of shape (3,) where:
            - Index 0: Steering, where -1 is full left, +1 is full right (range: [-1,
              1]).
            - Index 1: Gas, (range: [0, 1]).
            - Index 2: Braking, (range: [0, 1]).
    """
    action = np.array([0.0, 0.0, 0.0])
    # Gray track detection parameters (RGB 95-115 range with +-5% tolerance)
    gray_low = 95
    gray_high = 115

    # Create 3D gray detection mask (all RGB channels within range)
    gray_mask = (
        (observation[:, :, 0] >= gray_low) & (observation[:, :, 0] <= gray_high) &
        (observation[:, :, 1] >= gray_low) & (observation[:, :, 1] <= gray_high) &
        (observation[:, :, 2] >= gray_low) & (observation[:, :, 2] <= gray_high)
    )

    gray_indices = np.argwhere(gray_mask)
    center_x = np.mean(gray_indices[:, 1]) if len(gray_indices) > 0 else observation.shape[1]
    // 2
    car_position = observation.shape[1] // 2
    offset = center_x - car_position

    steering_angle = np.clip(offset / 100.0, -1.0, 1.0)
    action[0] = steering_angle

    if abs(offset) > 10:
        action[1] = 0.0
        action[2] = 0.2
    else:
        action[1] = 0.8
        action[2] = 0.0

    gray_density = np.sum(gray_mask) / (observation.shape[0] * observation.shape[1])
    if gray_density < 0.1:
        action[1] = 0.4
        action[2] = 0.3
    return action

```

Figure 18: Code template for the Car Racing Task

```

def choose_action(s: list, last_action: int, s_pre: list) -> int:
    """
    Selects an action for the Lunar Lander to achieve a safe landing at the target location
    (0, 0).
    Args:
        s (list or np.ndarray): The current state of the lander. Elements:
            s[0] - horizontal position (x)
            s[1] - vertical position (y)
            s[2] - horizontal velocity (v_x)
            s[3] - vertical velocity (v_y)
            s[4] - angle (radians)
            s[5] - angular velocity
            s[6] - 1 if the first leg is in contact with the ground, else 0
            s[7] - 1 if the second leg is in contact with the ground, else 0
        last_action (int): The action taken in the previous step. One of:
            0 - do nothing
            1 - fire left orientation engine
            2 - fire main (upward) engine
            3 - fire right orientation engine
        s_pre (list or np.ndarray): The state of the lander *before* the last action was
            executed.
    Returns:
        int: The chosen action for the next step. One of:
            0 - do nothing
            1 - fire left orientation engine
            2 - fire main (upward) engine
            3 - fire right orientation engine
    """
    angle_targ = (s[0] * 0.5 + s[2] * 0.5) # Designed for better orientation control
    angle_targ = np.clip(angle_targ, -0.6, 0.6) # Slightly wider bounds for orientation

    # Update hover target with amplified sensitivity to vertical speed
    hover_targ = 0.3 * np.abs(s[0]) + 0.7 * (s[3] ** 2) # Greater weight for hover
    stabilizing

    # Calculate actions for adjustments
    angle_todo = (angle_targ - s[4]) * 1.6 - (s[5]) * 1.2 # More aggressive response for
    angle adjustments
    hover_todo = (hover_targ - s[1]) * 1.3 - (s[3]) * 0.4 # Enhanced weight for vertical
    control

    # Stabilizing when legs are in contact
    if s[6] or s[7]:
        angle_todo = 0 # Maintain upright position priority
        hover_todo -= (s[3]) * 0.4 # Stronger adjustment for vertical speed reduction

    # Decision-making based on refined thresholds and more responsive measures
    a = 0
    if hover_todo > np.abs(angle_todo) and hover_todo > 0.10: # Slightly tighter hover
        threshold
        a = 2 # Fire main engine
    elif angle_todo < -0.15: # Increased sensitivity for left engine
        a = 3
    elif angle_todo > 0.15: # Increased sensitivity for right engine
        a = 1
    return a

```

Figure 19: Code of the best discovered policy for the Lunar Lander task.

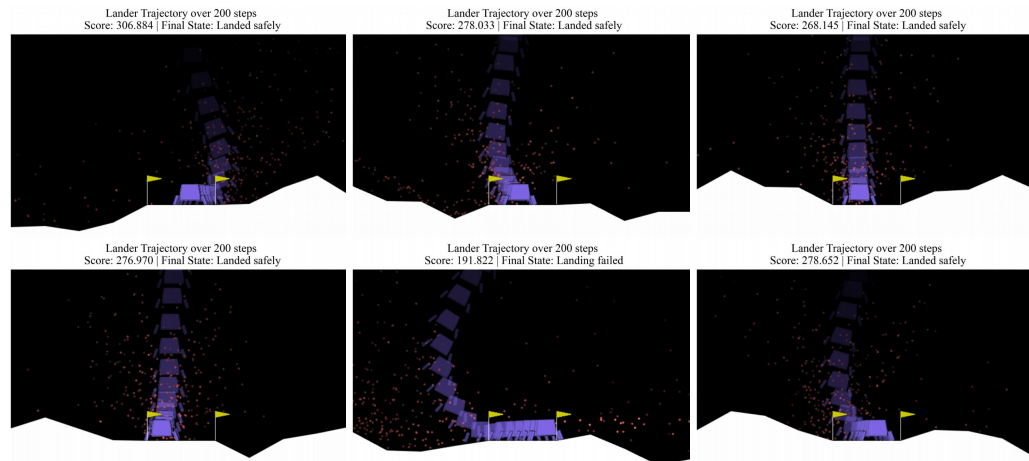

Figure 20: Performance of the best discovered policy on different instances in the Lunar Lander task. It shows the lander’s successful landings and stability under various conditions.



```

def choose_action(observation, car_speed, pre_action, pre_observation):
    """
    Determine the next action for the Car Racing agent.
    Args:
        observation (np.ndarray): The current state observed by the agent, represented as a 96
            x96 RGB image of the car and race track from a top-down view (shape: (96, 96, 3))
        car_speed (float): The current speed of the car.
        pre_action (np.ndarray): Action taken by the agent in the previous step, represented
            as a 3-element array.
        pre_observation (np.ndarray): The observation received when the previous action was
            taken. It has the same shape and format as 'observation' (i.e., a 96x96 RGB image
            ).
    Returns:
        np.ndarray: The action selected by the agent for the next step, represented as an
            array of shape (3,) where:
            - Index 0: Steering, where -1 is full left, +1 is full right (range: [-1,
                1]).
            - Index 1: Gas, (range: [0, 1]).
            - Index 2: Braking, (range: [0, 1]).
    """
    hsv = cv2.cvtColor(observation, cv2.COLOR_RGB2HSV)
    # Define masks for track, off-track, and curbs detection
    track_mask = cv2.inRange(hsv, (0, 0, 60), (179, 255, 200)) # Track pixels
    off_track_mask = cv2.inRange(hsv, (40, 100, 100), (90, 255, 255)) # Off-track pixels
    curbs_mask = cv2.inRange(hsv, (180, 100, 100), (255, 255, 255)) # Curbs detection

    # Analyze the center region for better decision making
    height, width = track_mask.shape
    center_region = track_mask[int(height / 3):int(2 * height / 3), int(width / 4):int(3 *
        width / 4)]
    # Initialize the action array
    action = np.zeros(3)
    # Identify whether track is present and where
    track_detected = np.sum(center_region) > 0
    if not track_detected:
        action[2] = 1.0 # Full brake if no track detected
    else:
        # Identify track pixel positions
        track_pixels = np.column_stack(np.where(center_region > 0))
        mean_x = np.mean(track_pixels[:, 1]) if len(track_pixels) > 0 else center_region.shape
            [1] / 2

        # Steering adjustment with consideration for immediate curvature
        steering = (mean_x - (center_region.shape[1] / 2)) / (center_region.shape[1] / 2)
        action[0] = np.clip(steering, -1, 1) # Normalize steering value

    # Adaptive throttle management based on speed
    if car_speed < 1.0:
        action[1] = 1.0 # Full throttle if the car is very slow
    else:
        # Adjust throttle considering steering
        if abs(action[0]) > 0.5:
            action[1] = max(0.0, 1.0 - abs(action[0])) # Reduce throttle during significant
                turns
        else:
            action[1] = min(1.0, action[1] + 0.05) # Gradual increase on straights

    # Enhanced braking logic considering sharp turns
    if abs(action[0]) > 0.6 and car_speed > 2.0:
        action[2] = min(0.4, action[2] + 0.1) # Moderate braking for sudden turns
    else:
        action[2] = 0.0 # No brake needed on straights

    # Prevent the car from stalling
    if np.all(pre_action == [0, 0, 1]) and car_speed < 0.5:
        action[1] = max(action[1], 0.5) # Ensure some throttle to avoid stalling
    return action

```

Figure 21: Code of the best discovered policy for the Car Racing task.

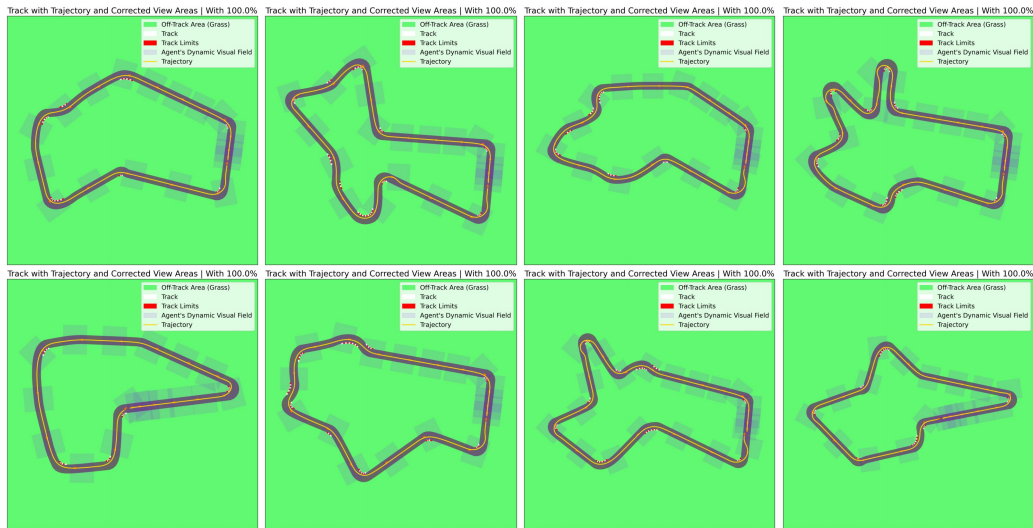

Figure 22: Performance of the best discovered policy on different instances in the Car Racing task. These figures show the car’s smooth track completion and race line strategy, similar to human racing behavior.
