# Supplementary material
Source: ML conference proceedings conference paper supplement (https://openreview.net/forum?id=OHFNJoNtjW)

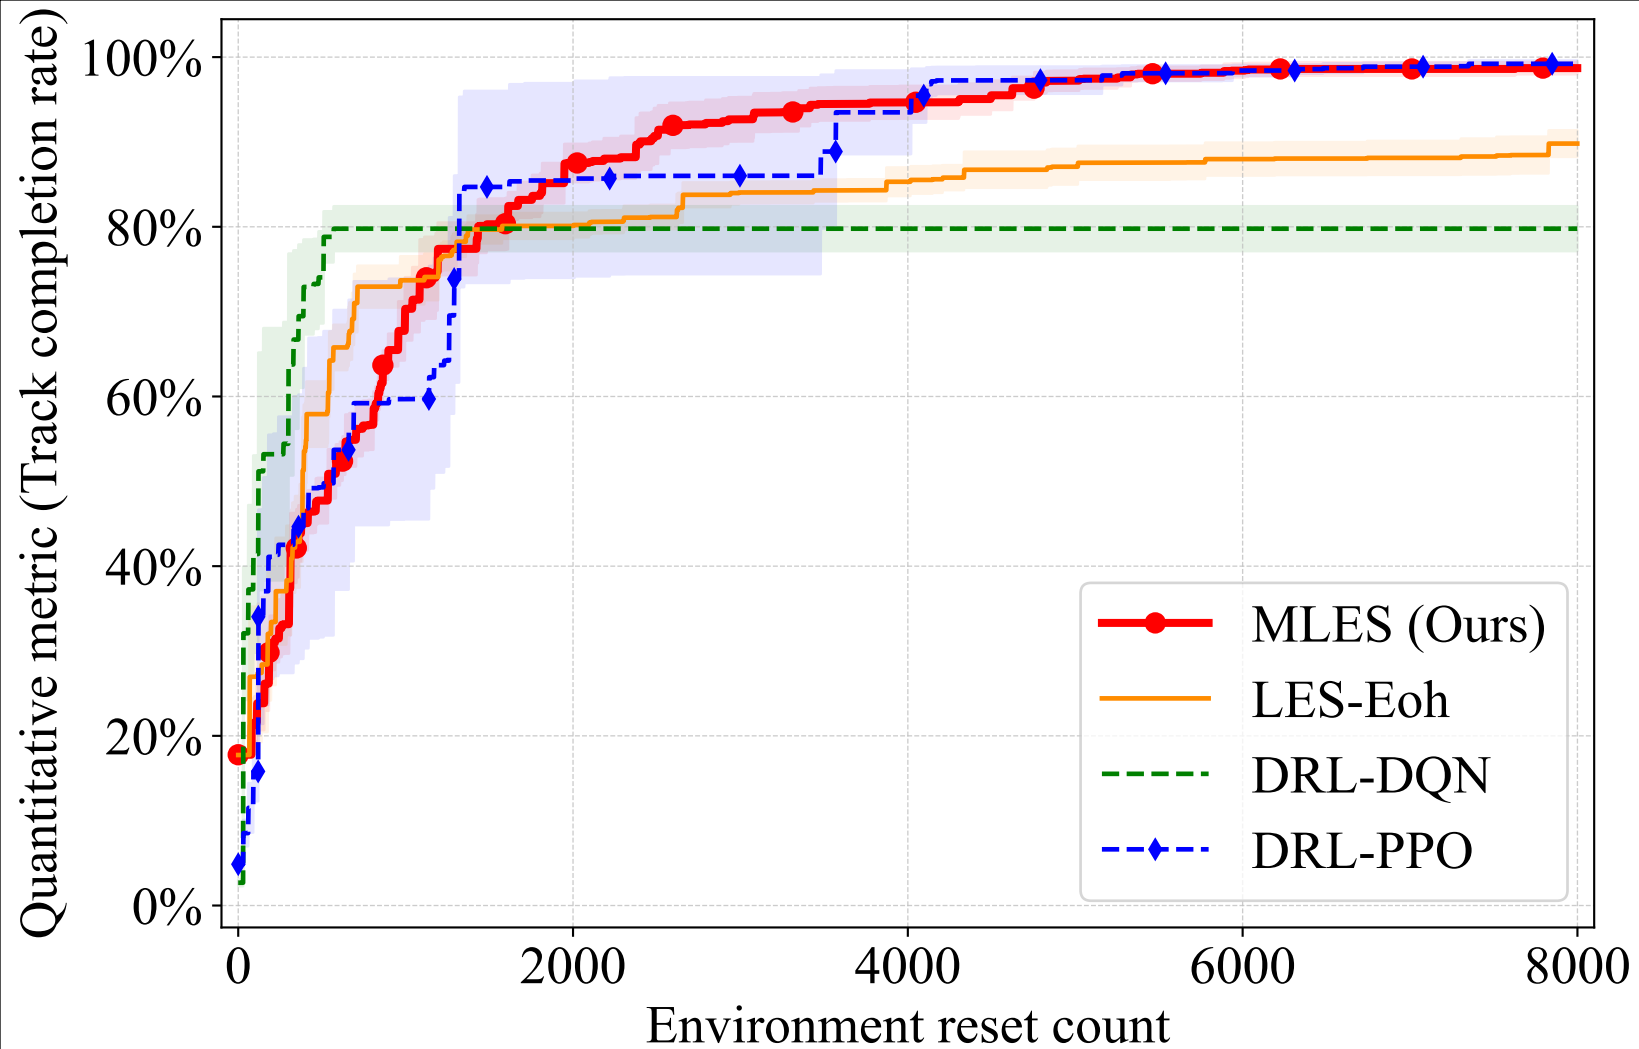

Supplement: supplementary_material [file car_racing_evolurion_process.pdf › supplementary_material/Code/MLES/analysis_results/car_racing_evolurion_process.pdf]
